# Supplementary material for: Association analysis of g.68G → A SNP in CAPN1 gene with carcass and meatquality traits in goose raised in organic &lt;i&gt;dehesa&lt;/i&gt;
Source: Copernicus journal article supplement (doi:10.5194/aab-59-423-2016), 2016-10-17
Supplement: Supplementary file 1 [file aab-59-423-2016-supplement.pdf]

Supplement of Arch. Anim. Breed., 59, 423–428, 2016  
<http://www.arch-anim-breed.net/59/423/2016/>  
doi:10.5194/aab-59-423-2016-supplement  
© Author(s) 2016. CC Attribution 3.0 License.

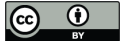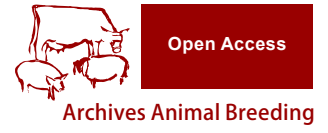

*Supplement of*

## **Association analysis of g.68G → A SNP in CAPN1 gene with carcass and meat quality traits in goose raised in organic *dehesa***

**Marina Solé et al.**

*Correspondence to:* Marina Solé (ge2sobem@uco.es)

The copyright of individual parts of the supplement might differ from the CC-BY 3.0 licence.

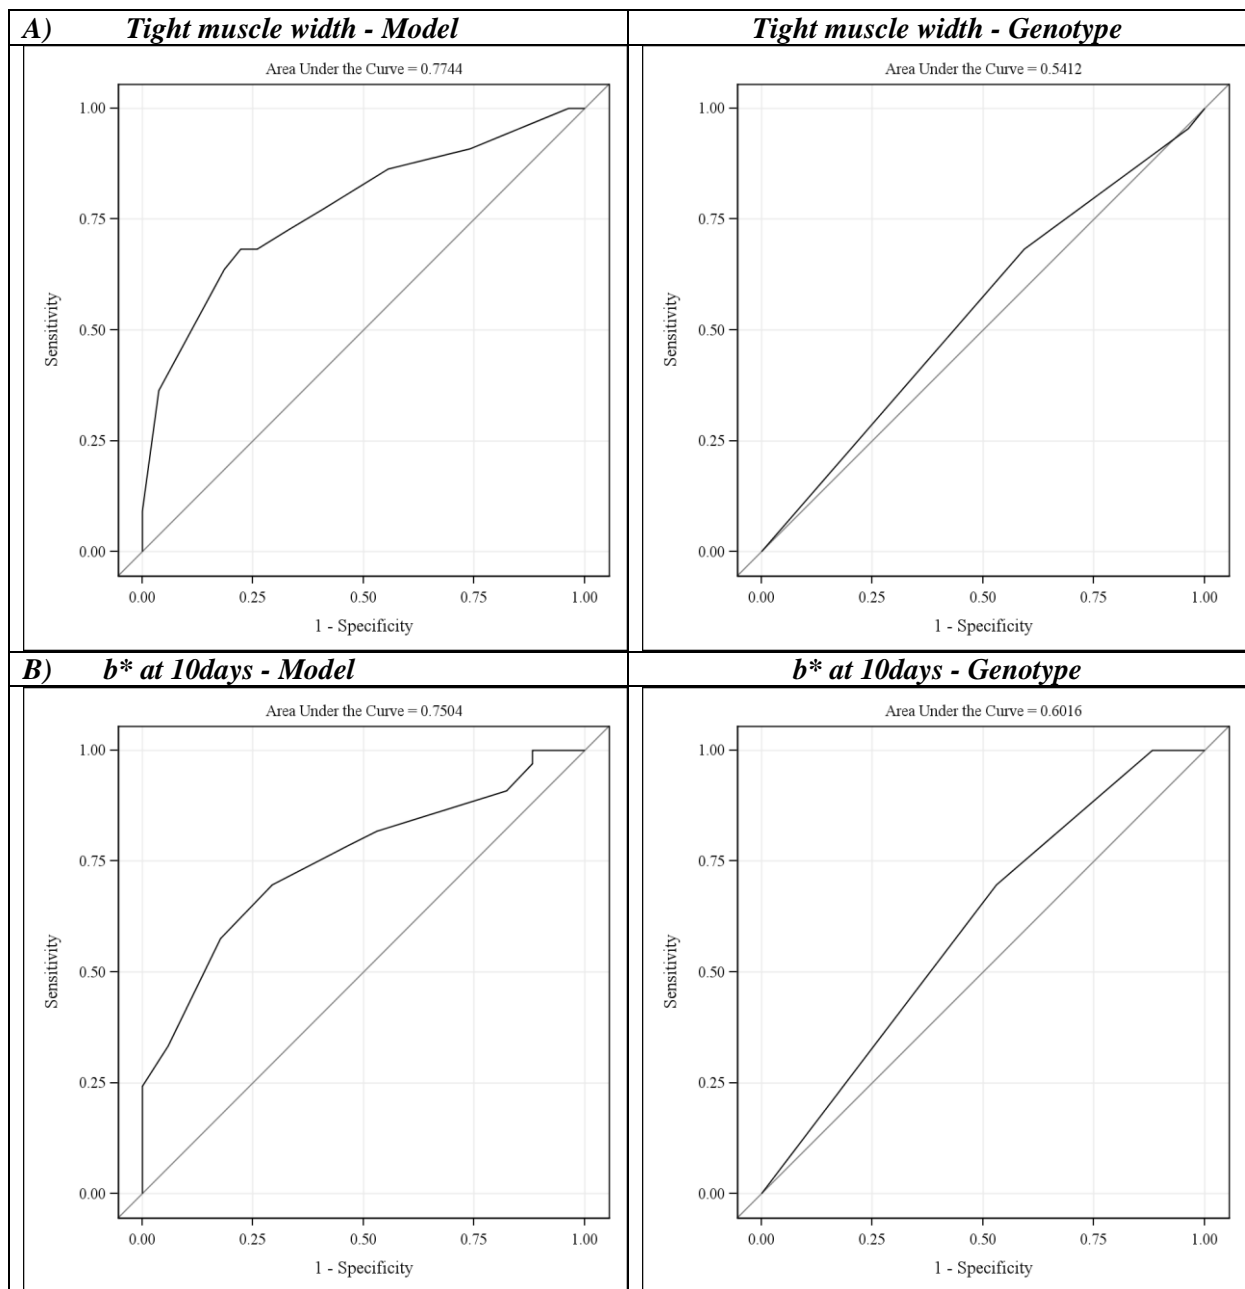

**Figure S1A and S1B:** Receiver Operating Characteristics (ROC) curve analysis for model and gene predictive ability evaluation of tight muscle width and  $b^*$  parameter (meat color) at the tenth day in the global goose population.

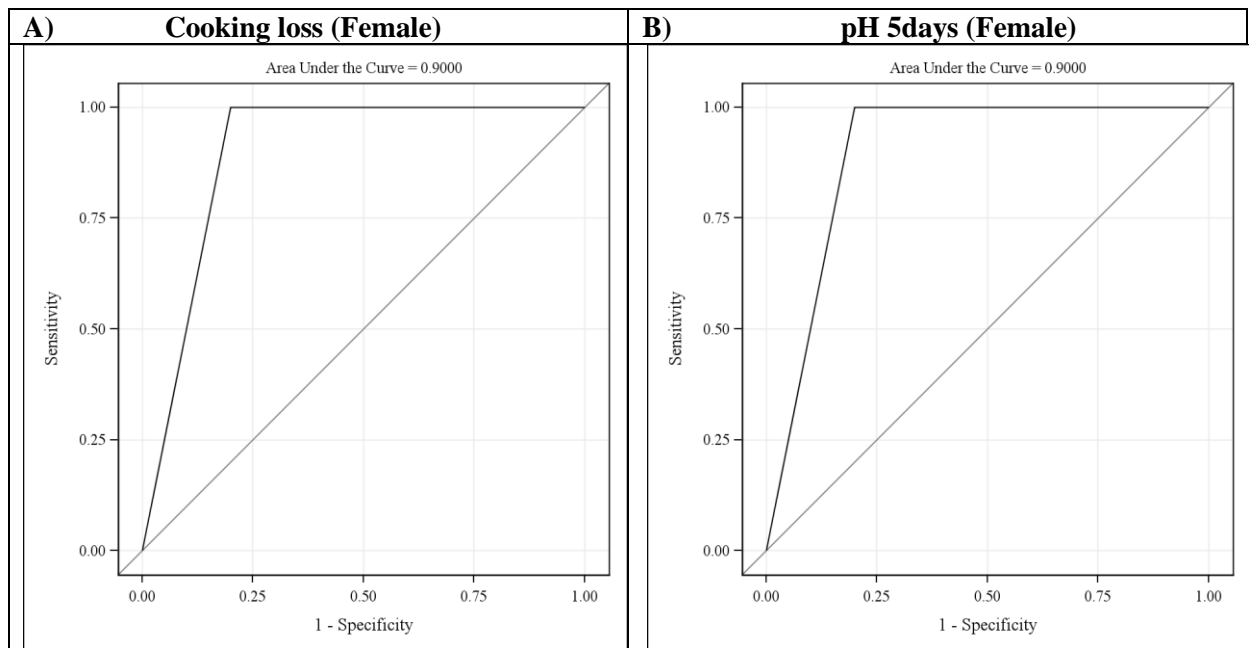

**Figure S2A and S2B:** Receiver Operating Characteristics (ROC) curve analysis for model predictive ability evaluation of cooking loss and pH at the fifth day in female individuals of the Embden subpopulation.

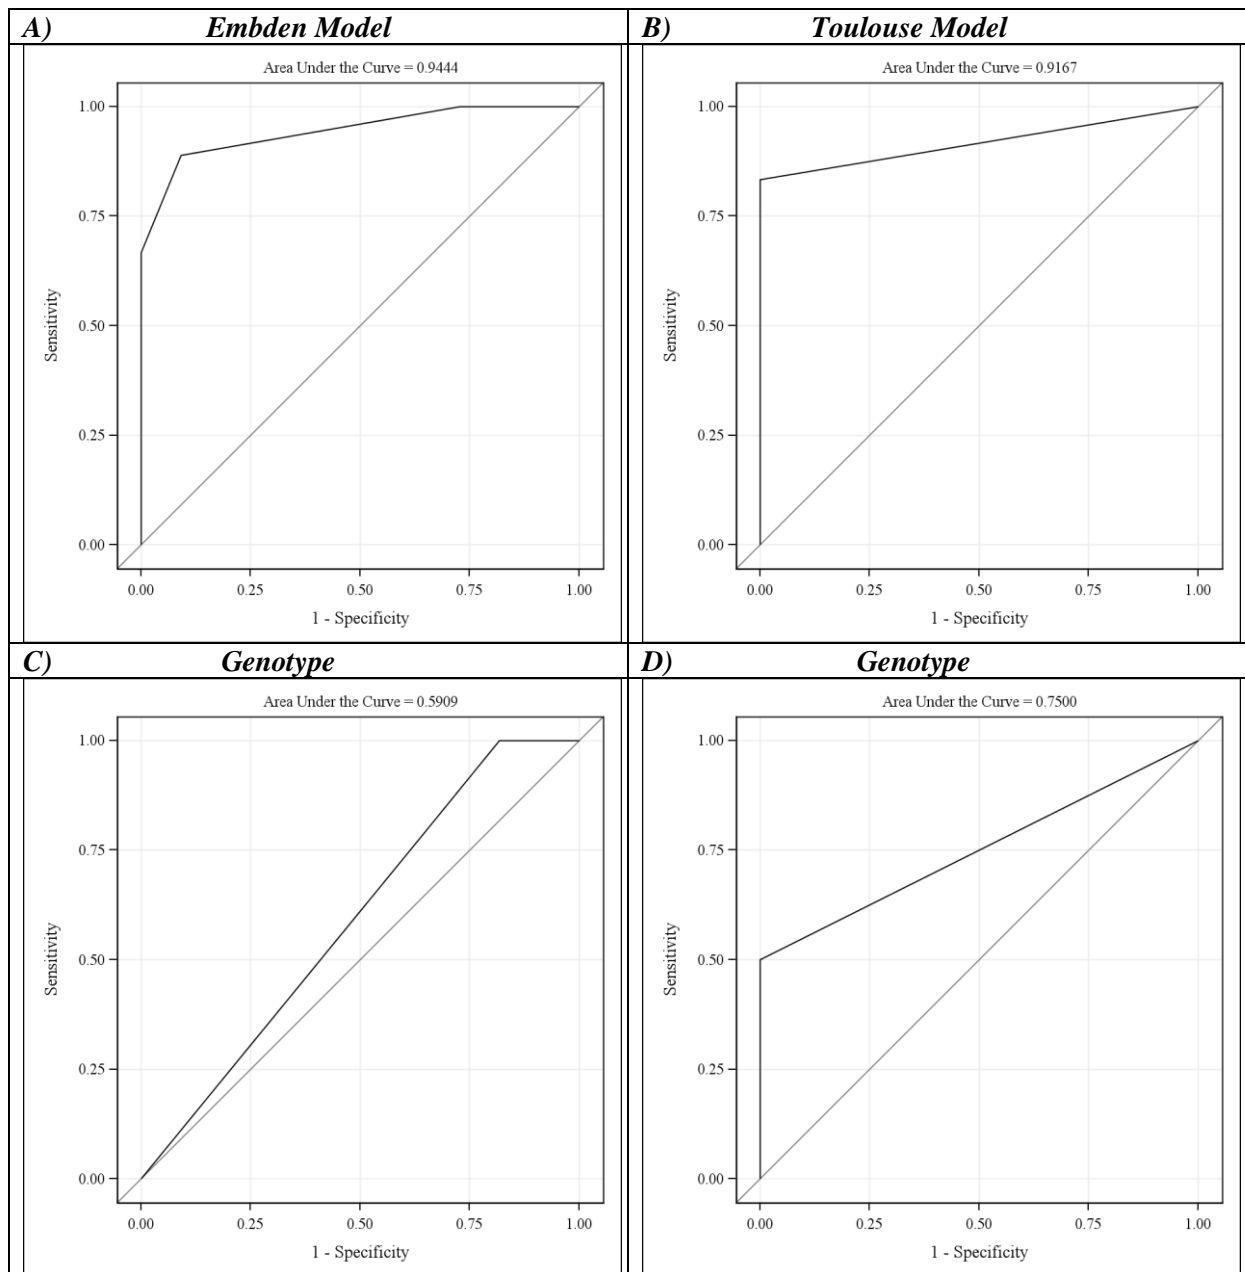

**Figure S3A and S3B, S3C and S3D:** Receiver Operating Characteristics (ROC) curve analyses for the model and the gene predictive ability evaluation of meat tenderness (WBSF) in the Embden and Toulouse
